# Supplementary material for: Discriminatory ability of simple OGTT-based beta cell function indices for prediction of prediabetes and type 2 diabetes: the CODAM study
Source: PubMed Central journal article supplement (PMC6518926; doi:10.1007/s00125-016-4165-3), 2016-12-08
Supplement: 125_2016_4165_MOESM1_ESM.pdf [file 125_2016_4165_MOESM1_ESM.pdf]

ESM table 1: Discrimination Between Individuals with Prevalent T2DM (n=60) or Prediabetes (n=122) and Either NGM (n=294) or Non-diabetes (n=416) by BCF-indices

|                                             | Non-T2DM versus T2DM | Rank  | T2DM versus NGM | Rank | Prediabetes versus NGM | Rank  |
|---------------------------------------------|----------------------|-------|-----------------|------|------------------------|-------|
| <i>Fasting BCF-indices</i>                  |                      |       |                 |      |                        |       |
| HOMA B1                                     | 60 (52, 68)          | 16    | 61 (53, 69)     | 15   | 52 (45, 59)            | 21    |
| HOMA B2                                     | 65 (57, 73)          | 13-14 | 67 (58, 75)     | 14   | 53 (46, 59)            | 20    |
| I <sub>0</sub> /G <sub>0</sub> ratio        | 59 (50, 67)          | 18    | 61 (52, 70)     | 16   | 57 (51, 64)            | 11    |
| CP <sub>0</sub> /G <sub>0</sub> ratio       | 58 (51, 65)          | 20    | 60 (52, 68)     | 17   | 56 (50, 63)            | 14    |
| <i>Early-phase BCF-indices</i>              |                      |       |                 |      |                        |       |
| I <sub>30</sub> /I <sub>0</sub> ratio       | 85 (80, 90)          | 3     | 89 (85, 94)     | 3    | 67 (61, 72)            | 6     |
| CP <sub>30</sub> /CP <sub>0</sub> ratio     | 88 (83, 92)          | 1     | 92 (88, 95)     | 1    | 71 (66, 76)            | 2     |
| ΔI <sub>30</sub> /ΔG <sub>30</sub> ratio    | 79 (73, 84)          | 6     | 83 (77, 88)     | 6    | 66 (60, 72)            | 7     |
| ΔI <sub>30</sub> /G <sub>30</sub> ratio     | 78 (72, 84)          | 7-8   | 82 (76, 88)     | 7-8  | 57 (51, 63)            | 12-13 |
| ΔCP <sub>30</sub> /ΔG <sub>30</sub> ratio   | 84 (79, 89)          | 4     | 89 (84, 93)     | 4    | 73 (67, 78)            | 1     |
| CIR <sub>30</sub>                           | 87 (82, 91)          | 2     | 91 (87, 95)     | 2    | 68 (63, 73)            | 5     |
| Stumvoll early-phase                        | 68 (60, 77)          | 12    | 71 (63, 79)     | 12   | 54 (48, 61)            | 15-16 |
| BIGTT-AIR <sub>0.30.120</sub>               | 74 (67, 81)          | 9     | 78 (71, 85)     | 9    | 57 (51, 63)            | 12-13 |
| BIGTT-AIR <sub>0.60.120</sub>               | 73 (66, 80)          | 10    | 76 (69, 84)     | 10   | 62 (55, 68)            | 8     |
| <i>Late-phase BCF-indices</i>               |                      |       |                 |      |                        |       |
| Stumvoll second phase                       | 65 (57, 73)          | 13-14 | 67 (58, 76)     | 13   | 54 (48, 61)            | 15-16 |
| I <sub>120</sub> /I <sub>0</sub> ratio      | 54 (46, 61)          | 21    | 55 (48, 61)     | 21   | 69 (64, 75)            | 3-4   |
| CP <sub>120</sub> /CP <sub>0</sub> ratio    | 60 (51, 68)          | 17    | 57 (48, 65)     | 19   | 53 (47, 58)            | 18-19 |
| ΔI <sub>120</sub> /ΔG <sub>120</sub> ratio  | 58 (52, 64)          | 19    | 55 (49, 61)     | 20   | 54 (48, 59)            | 17    |
| ΔCP <sub>120</sub> /ΔG <sub>120</sub> ratio | 62 (57, 68)          | 15    | 58 (52, 64)     | 18   | 53 (47, 58)            | 18-19 |
| CIR <sub>120</sub>                          | 82 (78, 87)          | 5     | 84 (79, 88)     | 5    | 69 (64, 75)            | 3-4   |
| <i>Overall BCF-indices</i>                  |                      |       |                 |      |                        |       |
| I <sub>AUC</sub> / G <sub>AUC</sub> ratio   | 71 (64, 78)          | 11    | 73 (66, 81)     | 11   | 60 (54, 66)            | 9     |
| CP <sub>AUC</sub> / G <sub>AUC</sub> ratio  | 78 (72, 84)          | 7-8   | 82 (76, 88)     | 7-8  | 59 (53, 65)            | 10    |

T2DM, type 2 diabetes; NGM, normal glucose metabolism; Non-T2DM = normal glucose metabolism + prediabetes

Values represent ROC AUC in % (95%-confidence interval).

'Rank' reflects the order of ROC AUC estimates from high (1) to low (20). Differences between consecutively ranked ROC AUCs were not statistically significant.

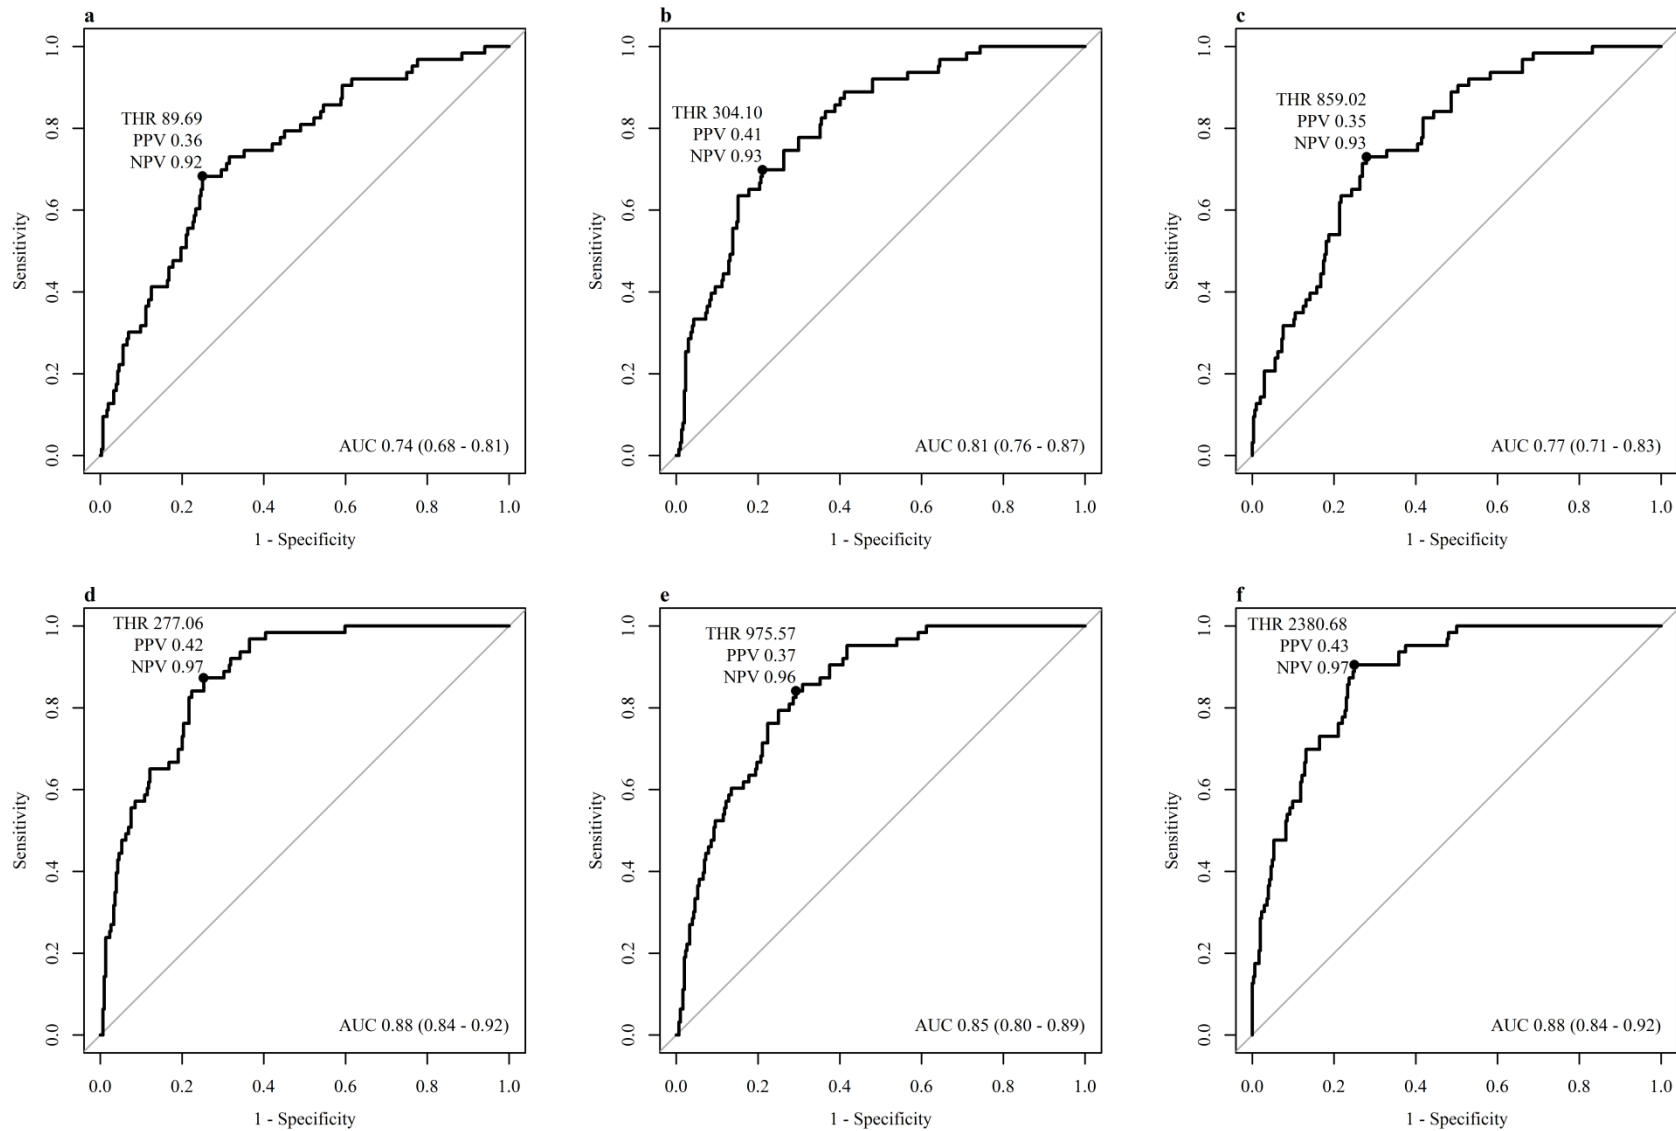

ESM figure 1: ROC curves and characteristics of the three BCF indices and corresponding disposition indices that consistently ranked highest:

- a)  $\Delta I_{30}/\Delta G_{30}$
- b)  $\Delta CP_{30}/\Delta G_{30}$
- c)  $CIR_{30}$
- d)  $\Delta I_{30}/\Delta G_{30}$  DI
- e)  $\Delta CP_{30}/\Delta G_{30}$  DI
- f)  $CIR_{30}$  DI

AUC, Area under the Receiver Operating Curve (95% CI); THR, threshold value for the specific BCF index (Youden index); PPV, positive predicted value; NPV, negative predicted value  
The point on the ROC curve represents the THR.
